# Supplementary material
Source: MDPI journal article supplement (https://www.mdpi.com/2073-4395/12/8/1753)
Supplement: s1 [file s1]

| Soil and climate data of the experimental site |         |                          |                       |           |             |                        |                 |                    |                  |             |                               |                             |
|------------------------------------------------|---------|--------------------------|-----------------------|-----------|-------------|------------------------|-----------------|--------------------|------------------|-------------|-------------------------------|-----------------------------|
| No.                                            | Site    | Latitude, longitude      | Regional distribution | Crop type | SOM (g/ kg) | Soil total N<br>(g/kg) | Planting method | Precipitation (mm) | Temperature (°C) | ST (1999)   | Total biomass<br>(dry weight) | yield (kg/hm <sup>2</sup> ) |
| 1                                              | Shaanxi | 35°12'787"N,107°44'703"E | Northwest China       | wheat     | 12.00       | 0.79                   | crop rotation   | 580                | 9.1              | Inceptisols | 2341                          | 3158                        |
| 2                                              | Shaanxi | 35°12'787"N,107°44'703"E | Northwest China       | wheat     | 12.00       | 0.79                   | crop rotation   | 580                | 9.1              | Inceptisols | 734                           | 2922                        |
| 3                                              | Shaanxi | 35°12'787"N,107°44'703"E | Northwest China       | wheat     | 12.00       | 0.79                   | crop rotation   | 580                | 9.1              | Inceptisols | 2291                          | 2651                        |
| 4                                              | Shaanxi | 35°12'787"N,107°44'703"E | Northwest China       | wheat     | 9.67        | 0.79                   | crop rotation   | 664.5              | 9.1              | Inceptisols | 3083                          | 3238                        |
| 5                                              | Shaanxi | 35°12'787"N,107°44'703"E | Northwest China       | wheat     | 12.00       | 0.79                   | crop rotation   | 664.5              | 9.1              | Inceptisols | 2891                          | 3169                        |
| 6                                              | Shaanxi | 35°12'787"N,107°44'703"E | Northwest China       | wheat     | 12.00       | 0.79                   | crop rotation   | 664.5              | 9.1              | Inceptisols | 2442                          | 3144                        |
| 7                                              | Shaanxi | 35°12'787"N,107°44'703"E | Northwest China       | wheat     | 40.50       | 0.79                   | crop rotation   | 722.2              | 9.1              | Inceptisols | 2464                          | 4427                        |
| 8                                              | Shaanxi | 35°12'787"N,107°44'703"E | Northwest China       | wheat     | 12.00       | 0.79                   | crop rotation   | 722.2              | 9.1              | Inceptisols | 2535                          | 3790                        |
| 9                                              | Shaanxi | 35°12'787"N,107°44'703"E | Northwest China       | wheat     | 12.00       | 0.79                   | crop rotation   | 722.2              | 9.1              | Inceptisols | 3148                          | 3832                        |
| 10                                             | Shaanxi | 35°12'787"N,107°44'703"E | Northwest China       | wheat     | 11.80       | 0.79                   | crop rotation   | 476.8              | 9.1              | Inceptisols | 2743                          | 6249                        |
| 11                                             | Shaanxi | 35°12'787"N,107°44'703"E | Northwest China       | wheat     | 11.80       | 0.79                   | crop rotation   | 476.8              | 9.1              | Inceptisols | 2903                          | 5814                        |
| 12                                             | Shaanxi | 35°12'787"N,107°44'703"E | Northwest China       | wheat     | 11.80       | 0.79                   | crop rotation   | 476.8              | 9.1              | Inceptisols | 1622                          | 5353                        |
| 13                                             | Shaanxi | 35°12'00"N,107°40'30"E   | Northwest China       | wheat     | 11.80       | 0.79                   | crop rotation   | 480.5              | 9.1              | Inceptisols |                               | 4073                        |
| 14                                             | Shaanxi | 35°12'00"N,107°40'30"E   | Northwest China       | wheat     | 11.80       | 0.79                   | crop rotation   | 480.5              | 9.1              | Inceptisols |                               | 4565                        |
| 15                                             | Shaanxi | 35°12'00"N,107°40'30"E   | Northwest China       | wheat     | 11.80       | 0.79                   | crop rotation   | 480.5              | 9.1              | Inceptisols |                               | 4587                        |
| 16                                             | Shaanxi | 35°12'00"N,107°40'30"E   | Northwest China       | wheat     | 11.80       | 0.79                   | crop rotation   | 480.5              | 9.1              | Inceptisols | 0                             | 4357                        |
| 17                                             | Shaanxi | 35°12'00"N,107°40'30"E   | Northwest China       | wheat     | 11.80       | 0.79                   | crop rotation   | 480.5              | 9.1              | Inceptisols |                               | 5012                        |
| 18                                             | Shaanxi | 35°12'00"N,107°40'30"E   | Northwest China       | wheat     | 11.80       | 0.79                   | crop rotation   | 480.5              | 9.1              | Inceptisols |                               | 5329                        |
| 19                                             | Shaanxi | 35°12'00"N,107°40'30"E   | Northwest China       | wheat     | 11.80       | 0.79                   | crop rotation   | 480.5              | 9.1              | Inceptisols |                               | 5216                        |
| 20                                             | Shaanxi | 35°12'00"N,107°40'30"E   | Northwest China       | wheat     | 11.80       | 0.79                   | crop rotation   | 480.5              | 9.1              | Inceptisols |                               | 5443                        |
| 21                                             | Shaanxi | 35°12'00"N,107°40'30"E   | Northwest China       | wheat     | 11.80       | 0.79                   | crop rotation   | 480.5              | 9.1              | Inceptisols | 0                             | 5249                        |
| 22                                             | Shaanxi | 35°12'00"N,107°40'30"E   | Northwest China       | wheat     | 11.80       | 0.79                   | crop rotation   | 480.5              | 9.1              | Inceptisols |                               | 5709                        |

|    |          |                        |                         |       |       |      |               |       |      |             |       |
|----|----------|------------------------|-------------------------|-------|-------|------|---------------|-------|------|-------------|-------|
| 23 | Shaanxi  | 35°12'00"N,107°40'30"E | Northwest China         | wheat | 11.80 | 0.79 | crop rotation | 480.5 | 9.1  | Inceptisols | 5305  |
| 24 | Shaanxi  | 35°12'00"N,107°40'30"E | Northwest China         | wheat | 11.80 | 0.79 | crop rotation | 480.5 | 9.1  | Inceptisols | 5356  |
| 25 | Jiangsu  | 31°17'N,119°54'E       | East China              | rice  | 18.80 | 1.3  | crop rotation | 1177  | 16.1 | Inceptisols | 12438 |
| 26 | Jiangsu  | 31°17'N,119°54'E       | East China              | rice  | 18.80 | 1.3  | crop rotation | 1177  | 16.1 | Inceptisols | 12438 |
| 27 | Jiangsu  | 31°17'N,119°54'E       | East China              | rice  | 18.80 | 1.3  | crop rotation | 1177  | 16.1 | Inceptisols | 12438 |
| 28 | Jiangsu  | 31°17'N,119°54'E       | East China              | rice  | 18.80 | 1.3  | crop rotation | 1177  | 16.1 | Inceptisols | 12438 |
| 29 | Jiangsu  | 31°17'N,119°54'E       | East China              | rice  | 18.80 | 1.3  | crop rotation | 1177  | 16.1 | Inceptisols | 8000  |
| 30 | Jiangsu  | 31°17'N,119°54'E       | East China              | rice  | 18.80 | 1.3  | crop rotation | 1177  | 16.1 | Inceptisols | 8000  |
| 31 | Jiangsu  | 31°17'N,119°54'E       | East China              | rice  | 18.80 | 1.3  | crop rotation | 1177  | 16.1 | Inceptisols | 8000  |
| 32 | Jiangsu  | 31°17'N,119°54'E       | East China              | rice  | 18.80 | 1.3  | crop rotation | 1177  | 16.1 | Inceptisols | 8000  |
| 33 | Gansu    | 37°93'N,102°63'E       | Northwest China         | maize | 12.00 |      | Intercropping | 150   | 7.8  | Inceptisols | 13070 |
| 34 | Gansu    | 37°93'N,102°63'E       | Northwest China         | maize | 12.00 |      | Intercropping | 150   | 7.8  | Inceptisols | 12649 |
| 35 | Gansu    | 37°93'N,102°63'E       | Northwest China         | maize | 12.00 |      | Intercropping | 150   | 7.8  | Inceptisols | 14030 |
| 36 | Gansu    | 37°93'N,102°63'E       | Northwest China         | maize | 12.00 |      | Intercropping | 150   | 7.8  | Inceptisols | 13892 |
| 37 | Gansu    | 37°93'N,102°63'E       | Northwest China         | maize | 12.00 |      | Intercropping | 150   | 7.8  | Inceptisols | 12732 |
| 38 | Gansu    | 37°93'N,102°63'E       | Northwest China         | maize | 12.00 |      | Intercropping | 150   | 7.8  | Inceptisols | 11667 |
| 39 | Gansu    | 37°93'N,102°63'E       | Northwest China         | maize | 12.00 |      | Intercropping | 150   | 7.8  | Inceptisols | 13801 |
| 40 | Gansu    | 37°93'N,102°63'E       | Northwest China         | maize | 12.00 |      | Intercropping | 150   | 7.8  | Inceptisols | 13494 |
| 41 | Hunan    | 26°45'42"N,111°52'32"E | Central and South China | rice  | 12.00 | 1.58 | crop rotation | 1290  | 17.8 | Inceptisols | 9980  |
| 42 | Hunan    | 26°45'42"N,111°52'32"E | Central and South China | rice  | 12.00 | 1.58 | crop rotation | 1290  | 17.8 | Inceptisols | 9310  |
| 43 | Liaoning | 48°48'N,125°25'E       | Northeast China         | maize | 12.00 |      | crop rotation | 721.7 | 7.9  | Mollisols   | 11186 |
| 44 | Liaoning | 48°48'N,125°25'E       | Northeast China         | maize | 12.00 |      | crop rotation | 721.7 | 7.9  | Mollisols   | 10655 |
| 45 | Liaoning | 48°48'N,125°25'E       | Northeast China         | maize | 12.00 |      | crop rotation | 721.7 | 7.9  | Mollisols   | 9714  |
| 46 | Liaoning | 48°48'N,125°25'E       | Northeast China         | maize | 12.00 |      | crop rotation | 721.7 | 7.9  | Mollisols   | 9886  |
| 47 | Liaoning | 48°48'N,125°25'E       | Northeast China         | maize | 12.00 |      | crop rotation | 721.7 | 7.9  | Mollisols   | 10619 |

|    |          |                          |                         |       |       |      |               |       |      |             |        |        |
|----|----------|--------------------------|-------------------------|-------|-------|------|---------------|-------|------|-------------|--------|--------|
| 48 | Liaoning | 48°48'N,125°25'E         | Northeast China         | maize | 12.00 |      | crop rotation | 721.7 | 7.9  | Mollisols   |        | 9603   |
| 49 | Liaoning | 48°48'N,125°25'E         | Northeast China         | maize | 12.00 |      | crop rotation | 651.7 | 7.9  | Mollisols   |        | 10339  |
| 50 | Liaoning | 48°48'N,125°25'E         | Northeast China         | maize | 12.00 |      | crop rotation | 651.7 | 7.9  | Mollisols   |        | 9077   |
| 51 | Liaoning | 48°48'N,125°25'E         | Northeast China         | maize | 12.00 |      | crop rotation | 651.7 | 7.9  | Mollisols   |        | 8324   |
| 52 | Liaoning | 48°48'N,125°25'E         | Northeast China         | maize | 12.00 |      | crop rotation | 651.7 | 7.9  | Mollisols   |        | 10240  |
| 53 | Liaoning | 48°48'N,125°25'E         | Northeast China         | maize | 12.00 |      | crop rotation | 651.7 | 7.9  | Mollisols   |        | 8680   |
| 54 | Liaoning | 48°48'N,125°25'E         | Northeast China         | maize | 12.00 |      | crop rotation | 651.7 | 7.9  | Mollisols   |        | 8189   |
| 55 | Liaoning | 48°48'N,125°25'E         | Northeast China         | maize | 12.00 |      | crop rotation | 716.2 | 7.9  | Mollisols   |        | 10288  |
| 56 | Liaoning | 48°48'N,125°25'E         | Northeast China         | maize | 12.00 |      | crop rotation | 716.2 | 7.9  | Mollisols   |        | 9150   |
| 57 | Liaoning | 48°48'N,125°25'E         | Northeast China         | maize | 12.00 |      | crop rotation | 716.2 | 7.9  | Mollisols   |        | 8641   |
| 58 | Liaoning | 48°48'N,125°25'E         | Northeast China         | maize | 12.00 |      | crop rotation | 716.2 | 7.9  | Mollisols   |        | 9845   |
| 59 | Liaoning | 48°48'N,125°25'E         | Northeast China         | maize | 12.00 |      | crop rotation | 716.2 | 7.9  | Mollisols   |        | 8098   |
| 60 | Liaoning | 48°48'N,125°25'E         | Northeast China         | maize | 12.00 |      | crop rotation | 716.2 | 7.9  | Mollisols   |        | 8620   |
| 61 | Hunan    | 26°45'N,111°52'E         | Central and South China | rice  | 12.00 | 0.94 | crop rotation | 1250  | 18.3 | Inceptisols |        | 10680  |
| 62 | Hunan    | 26°45'N,111°52'E         | Central and South China | rice  | 12.00 | 0.94 | crop rotation | 1250  | 18.3 | Inceptisols |        | 11020  |
| 63 | Hunan    | 26°45'N,111°52'E         | Central and South China | rice  | 12.00 | 0.94 | crop rotation | 1250  | 18.3 | Inceptisols |        | 9530   |
| 64 | Hunan    | 26°45'N,111°52'E         | Central and South China | rice  | 12.00 | 0.94 | crop rotation | 1250  | 18.3 | Inceptisols |        | 10630  |
| 65 | Shaanxi  | 34°21'N,108°110'E        | Northwest China         | wheat | 15.19 | 0.95 | crop rotation | 634   | 13   | Alfisols    | 2485   | 5513.6 |
| 66 | Shaanxi  | 34°21'N,108°110'E        | Northwest China         | wheat | 15.19 | 0.95 | crop rotation | 634   | 13   | Alfisols    | 2390   | 5660.3 |
| 67 | Shaanxi  | 34°21'N,108°110'E        | Northwest China         | wheat | 15.19 | 0.95 | crop rotation | 634   | 13   | Alfisols    | 410    | 4826.9 |
| 68 | Shaanxi  | 34°21'N,108°110'E        | Northwest China         | wheat | 15.19 | 0.95 | crop rotation | 634   | 13   | Alfisols    | 1700   | 5080.3 |
| 69 | Shaanxi  | 35°12'787"N,107°44'703"E | Northwest China         | wheat | 12.00 | 0.79 | crop rotation | 580   | 9.1  | Inceptisols | 3083.3 | 3141.4 |
| 70 | Shaanxi  | 35°12'787"N,107°44'703"E | Northwest China         | wheat | 12.00 | 0.79 | crop rotation | 580   | 9.1  | Inceptisols | 3083.3 | 3311.6 |
| 71 | Shaanxi  | 35°12'787"N,107°44'703"E | Northwest China         | wheat | 12.00 | 0.79 | crop rotation | 580   | 9.1  | Inceptisols | 3083.3 | 3172.3 |
| 72 | Shaanxi  | 35°12'787"N,107°44'703"E | Northwest China         | wheat | 12.00 | 0.79 | crop rotation | 580   | 9.1  | Inceptisols | 3083.3 | 3327.9 |

|    |         |                          |                 |       |       |      |               |       |     |             |        |        |
|----|---------|--------------------------|-----------------|-------|-------|------|---------------|-------|-----|-------------|--------|--------|
| 73 | Shaanxi | 35°12'787"N,107°44'703"E | Northwest China | wheat | 12.00 | 0.79 | crop rotation | 580   | 9.1 | Inceptisols | 2890.9 | 3108.3 |
| 74 | Shaanxi | 35°12'787"N,107°44'703"E | Northwest China | wheat | 12.00 | 0.79 | crop rotation | 580   | 9.1 | Inceptisols | 2890.9 | 3167.8 |
| 75 | Shaanxi | 35°12'787"N,107°44'703"E | Northwest China | wheat | 12.00 | 0.79 | crop rotation | 580   | 9.1 | Inceptisols | 2890.9 | 3124.6 |
| 76 | Shaanxi | 35°12'787"N,107°44'703"E | Northwest China | wheat | 12.00 | 0.79 | crop rotation | 580   | 9.1 | Inceptisols | 2890.9 | 3276.2 |
| 77 | Shaanxi | 35°12'787"N,107°44'703"E | Northwest China | wheat | 12.00 | 0.79 | crop rotation | 580   | 9.1 | Inceptisols | 2431.7 | 2379.1 |
| 78 | Shaanxi | 35°12'787"N,107°44'703"E | Northwest China | wheat | 12.00 | 0.79 | crop rotation | 580   | 9.1 | Inceptisols | 2431.7 | 3341.4 |
| 79 | Shaanxi | 35°12'787"N,107°44'703"E | Northwest China | wheat | 12.00 | 0.79 | crop rotation | 580   | 9.1 | Inceptisols | 2431.7 | 3329.6 |
| 80 | Shaanxi | 35°12'787"N,107°44'703"E | Northwest China | wheat | 12.00 | 0.79 | crop rotation | 580   | 9.1 | Inceptisols | 2431.7 | 3527.1 |
| 81 | Shaanxi | 35°12'787"N,107°44'703"E | Northwest China | wheat | 12.00 | 0.79 | crop rotation | 647.8 | 9.1 | Inceptisols | 2381.7 | 3248.8 |
| 82 | Shaanxi | 35°12'787"N,107°44'703"E | Northwest China | wheat | 12.00 | 0.79 | crop rotation | 647.8 | 9.1 | Inceptisols | 2381.7 | 3938   |
| 83 | Shaanxi | 35°12'787"N,107°44'703"E | Northwest China | wheat | 12.00 | 0.79 | crop rotation | 647.8 | 9.1 | Inceptisols | 2381.7 | 3800   |
| 84 | Shaanxi | 35°12'787"N,107°44'703"E | Northwest China | wheat | 12.00 | 0.79 | crop rotation | 647.8 | 9.1 | Inceptisols | 2381.7 | 3648.1 |
| 85 | Shaanxi | 35°12'787"N,107°44'703"E | Northwest China | wheat | 12.00 | 0.79 | crop rotation | 647.8 | 9.1 | Inceptisols | 2673   | 2551.5 |
| 86 | Shaanxi | 35°12'787"N,107°44'703"E | Northwest China | wheat | 12.00 | 0.79 | crop rotation | 647.8 | 9.1 | Inceptisols | 2673   | 3503   |
| 87 | Shaanxi | 35°12'787"N,107°44'703"E | Northwest China | wheat | 12.00 | 0.79 | crop rotation | 647.8 | 9.1 | Inceptisols | 2673   | 3126.4 |
| 88 | Shaanxi | 35°12'787"N,107°44'703"E | Northwest China | wheat | 12.00 | 0.79 | crop rotation | 647.8 | 9.1 | Inceptisols | 2673   | 3348.9 |
| 89 | Shaanxi | 35°12'787"N,107°44'703"E | Northwest China | wheat | 12.00 | 0.79 | crop rotation | 647.8 | 9.1 | Inceptisols | 3035.7 | 2582.8 |
| 90 | Shaanxi | 35°12'787"N,107°44'703"E | Northwest China | wheat | 12.00 | 0.79 | crop rotation | 647.8 | 9.1 | Inceptisols | 3035.7 | 3388.1 |
| 91 | Shaanxi | 35°12'787"N,107°44'703"E | Northwest China | wheat | 12.00 | 0.79 | crop rotation | 647.8 | 9.1 | Inceptisols | 3035.7 | 3420.2 |
| 92 | Shaanxi | 35°12'787"N,107°44'703"E | Northwest China | wheat | 12.00 | 0.79 | crop rotation | 647.8 | 9.1 | Inceptisols | 3035.7 | 3555.6 |
| 93 | Gansu   | 37°93'N,102°63'E         | Northwest China | maize | 12.00 | 1.36 | Intercropping | 201   | 10  | Inceptisols |        | 11133  |
| 94 | Gansu   | 37°93'N,102°63'E         | Northwest China | maize | 12.00 | 1.36 | Intercropping | 201   | 10  | Inceptisols |        | 12198  |
| 95 | Gansu   | 37°93'N,102°63'E         | Northwest China | maize | 12.00 | 1.36 | Intercropping | 201   | 10  | Inceptisols |        | 11678  |
| 96 | Gansu   | 37°93'N,102°63'E         | Northwest China | maize | 12.00 | 1.36 | Intercropping | 201   | 10  | Inceptisols |        | 11340  |
| 97 | Gansu   | 37°93'N,102°63'E         | Northwest China | maize | 12.00 | 1.36 | Intercropping | 201   | 10  | Inceptisols |        | 11340  |

|     |              |                       |                 |       |       |      |               |       |     |             |           |
|-----|--------------|-----------------------|-----------------|-------|-------|------|---------------|-------|-----|-------------|-----------|
| 98  | Gansu        | 37°93'N,102°63'E      | Northwest China | maize | 12.00 | 1.36 | Intercropping | 201   | 10  | Inceptisols | 12523     |
| 99  | Gansu        | 37°93'N,102°63'E      | Northwest China | maize | 12.00 | 1.36 | Intercropping | 176   | 10  | Inceptisols | 15821     |
| 100 | Gansu        | 37°93'N,102°63'E      | Northwest China | maize | 12.00 | 1.36 | Intercropping | 176   | 10  | Inceptisols | 15993     |
| 101 | Gansu        | 37°93'N,102°63'E      | Northwest China | maize | 12.00 | 1.36 | Intercropping | 176   | 10  | Inceptisols | 16726     |
| 102 | Gansu        | 37°93'N,102°63'E      | Northwest China | maize | 12.00 | 1.36 | Intercropping | 176   | 10  | Inceptisols | 15632     |
| 103 | Gansu        | 37°93'N,102°63'E      | Northwest China | maize | 12.00 | 1.36 | Intercropping | 176   | 10  | Inceptisols | 15632     |
| 104 | Gansu        | 37°93'N,102°63'E      | Northwest China | maize | 12.00 | 1.36 | Intercropping | 176   | 10  | Inceptisols | 16334     |
| 105 | Sichuan      | 30°45'N,106°02'E      | Southwest China | maize | 9.80  | 0.54 | crop rotation | 1020  | 17  | Inceptisols | 4450      |
| 106 | Sichuan      | 30°45'N,106°02'E      | Southwest China | maize | 9.80  |      | crop rotation | 1020  | 17  | Inceptisols | 6625      |
| 107 | Sichuan      | 30°45'N,106°02'E      | Southwest China | maize | 9.80  |      | crop rotation | 1020  | 17  | Inceptisols | 6550      |
| 108 | Sichuan      | 30°45'N,106°02'E      | Southwest China | maize | 9.80  | 0.54 | crop rotation | 1020  | 17  | Inceptisols | 6400      |
| 109 | Sichuan      | 30°45'N,106°02'E      | Southwest China | maize | 9.80  | 0.64 | Intercropping | 1020  | 17  | Inceptisols | 4946      |
| 110 | Sichuan      | 30°45'N,106°02'E      | Southwest China | maize | 9.80  | 0.64 | Intercropping | 1020  | 17  | Inceptisols | 4699      |
| 111 | Sichuan      | 30°45'N,106°02'E      | Southwest China | maize | 9.80  | 0.64 | Intercropping | 1020  | 17  | Inceptisols | 4651      |
| 112 | Shaanxi      | 35°12'N,107°45'E      | Northwest China | wheat | 8.20  | 0.8  | crop rotation | 580   | 9.1 | Inceptisols | 4119 2448 |
| 113 | Shaanxi      | 35°12'N,107°45'E      | Northwest China | wheat | 8.20  | 0.8  | crop rotation | 580   | 9.1 | Inceptisols | 5643 7667 |
| 114 | Shaanxi      | 35°12'N,107°45'E      | Northwest China | wheat | 8.20  | 0.8  | crop rotation | 580   | 9.1 | Inceptisols | 4082 5383 |
| 115 | Shaanxi      | 35°12'N,107°45'E      | Northwest China | wheat | 8.53  | 0.77 | crop rotation | 480.5 | 9.1 | Inceptisols | 2973      |
| 116 | Shaanxi      | 35°12'N,107°45'E      | Northwest China | wheat | 8.53  | 0.77 | crop rotation | 480.5 | 9.1 | Inceptisols | 3067      |
| 117 | Heilongjiang | 44°1'44"N,128°44'28"E | Northeast China | wheat | 12.00 | 2.25 |               | 611   | 3.4 |             | 5133      |
| 118 | Heilongjiang | 44°1'44"N,128°44'28"E | Northeast China | wheat | 12.00 | 2.25 |               | 611   | 3.4 |             | 5085      |
| 119 | Heilongjiang | 44°1'44"N,128°44'28"E | Northeast China | wheat | 12.00 | 2.25 |               | 611   | 3.4 |             | 5124      |
| 120 | Heilongjiang | 44°1'44"N,128°44'28"E | Northeast China | wheat | 12.00 | 2.25 |               | 611   | 3.4 |             | 5087      |
| 121 | Xinjiang     | 42°45'32"N,86°37'33"E | Northwest China | wheat |       |      |               | 236   | 7.3 |             | 4855.5    |
| 122 | Xinjiang     | 42°45'32"N,86°37'33"E | Northwest China | wheat |       |      |               | 236   | 7.3 |             | 5452.5    |

|     |          |                        |                         |       |       |      |               |       |      |             |         |
|-----|----------|------------------------|-------------------------|-------|-------|------|---------------|-------|------|-------------|---------|
| 123 | Xinjiang | 42°45'32"N,86°37'33"E  | Northwest China         | wheat |       |      |               | 236   | 7.3  |             | 5064    |
| 124 | Xinjiang | 42°45'32"N,86°37'33"E  | Northwest China         | wheat |       |      |               | 236   | 7.3  |             | 4917    |
| 125 | Anhui    | 31°72'N,118°10'E       | East China              | rice  | 18.80 | 1.23 | crop rotation | 1200  | 7.3  | Inceptisols | 7262.5  |
| 126 | Anhui    | 31°72'N,118°10'E       | East China              | rice  | 18.80 | 1.23 | crop rotation | 1200  | 7.3  | Inceptisols | 7925    |
| 127 | Anhui    | 31°72'N,118°10'E       | East China              | rice  | 18.80 | 1.23 | crop rotation | 1200  | 7.3  | Inceptisols | 7308.33 |
| 128 | Anhui    | 31°72'N,118°10'E       | East China              | rice  | 18.80 | 1.23 | crop rotation | 1200  | 7.3  | Inceptisols | 6408.33 |
| 129 | Hunan    | 26°45'42"N,111°52'32"E | Central and South China | rice  | 12.00 | 0.94 | crop rotation | 1290  | 17.8 | Inceptisols | 10779.7 |
| 130 | Hunan    | 26°45'42"N,111°52'32"E | Central and South China | rice  | 12.00 | 0.94 | crop rotation | 1290  | 17.8 | Inceptisols | 9939.1  |
| 131 | Gansu    | 38°37'N,102°40'E       | Northwest China         | wheat | 18.80 | 1.1  |               | 150   | 7.8  |             | 7188    |
| 132 | Gansu    | 38°37'N,102°40'E       | Northwest China         | maize | 18.80 | 1.1  |               | 150   | 7.8  |             | 7057    |
| 133 | Gansu    | 38°37'N,102°40'E       | Northwest China         | wheat | 18.80 | 1.1  |               | 150   | 7.8  |             | 6511    |
| 134 | Gansu    | 38°37'N,102°40'E       | Northwest China         | maize | 12.00 | 1.1  |               | 150   | 7.8  |             | 9340    |
| 135 | Qinghai  | 36°62'N,101°77'E       | Northwest China         | wheat | 12.00 | 1.11 | crop rotation | 367.5 | 5.9  | Mollisols   | 3458.24 |
| 136 | Qinghai  | 36°62'N,101°77'E       | Northwest China         | wheat | 12.00 |      | crop rotation | 367.5 | 5.9  | Mollisols   | 4801.79 |
| 137 | Qinghai  | 36°62'N,101°77'E       | Northwest China         | wheat | 12.00 |      | crop rotation | 367.5 | 5.9  | Mollisols   | 4602.52 |
| 138 | Qinghai  | 36°62'N,101°77'E       | Northwest China         | wheat | 12.00 |      | crop rotation | 367.5 | 5.9  | Mollisols   | 4660.3  |
| 139 | Qinghai  | 36°62'N,101°77'E       | Northwest China         | wheat | 12.00 |      | crop rotation | 367.5 | 5.9  | Mollisols   | 4889.62 |
| 140 | Qinghai  | 36°62'N,101°77'E       | Northwest China         | wheat | 12.00 |      | crop rotation | 367.5 | 5.9  | Mollisols   | 5960.32 |
| 141 | Qinghai  | 36°62'N,101°77'E       | Northwest China         | wheat | 12.00 | 1.11 | crop rotation | 367.5 | 5.9  | Mollisols   | 2865.36 |
| 142 | Qinghai  | 36°62'N,101°77'E       | Northwest China         | wheat | 12.00 |      | crop rotation | 367.5 | 5.9  | Mollisols   | 5608.92 |
| 143 | Qinghai  | 36°62'N,101°77'E       | Northwest China         | wheat | 12.00 |      | crop rotation | 367.5 | 5.9  | Mollisols   | 4723.93 |
| 144 | Qinghai  | 36°62'N,101°77'E       | Northwest China         | wheat | 12.00 |      | crop rotation | 367.5 | 5.9  | Mollisols   | 5638.93 |
| 145 | Qinghai  | 36°62'N,101°77'E       | Northwest China         | wheat | 12.00 |      | crop rotation | 367.5 | 5.9  | Mollisols   | 6411.09 |
| 146 | Qinghai  | 36°62'N,101°77'E       | Northwest China         | wheat | 12.00 |      | crop rotation | 367.5 | 5.9  | Mollisols   | 6297.52 |
| 147 | Qinghai  | 36°62'N,101°77'E       | Northwest China         | wheat | 12.00 | 1.11 | crop rotation | 367.5 | 5.9  | Mollisols   | 4129.66 |

|     |         |                        |                         |       |       |      |                     |       |      |             |         |
|-----|---------|------------------------|-------------------------|-------|-------|------|---------------------|-------|------|-------------|---------|
| 148 | Qinghai | 36°62'N,101°77'E       | Northwest China         | wheat | 12.00 |      | crop rotation       | 367.5 | 5.9  | Mollisols   | 6444.61 |
| 149 | Qinghai | 36°62'N,101°77'E       | Northwest China         | wheat | 18.80 |      | crop rotation       | 367.5 | 5.9  | Mollisols   | 7473.9  |
| 150 | Qinghai | 36°62'N,101°77'E       | Northwest China         | wheat | 18.80 |      | crop rotation       | 367.5 | 5.9  | Mollisols   | 7588.91 |
| 151 | Qinghai | 36°62'N,101°77'E       | Northwest China         | wheat | 12.00 |      | crop rotation       | 367.5 | 5.9  | Mollisols   | 8046.78 |
| 152 | Qinghai | 36°62'N,101°77'E       | Northwest China         | wheat | 12.00 |      | crop rotation       | 367.5 | 5.9  | Mollisols   | 8133.22 |
| 153 | Sichuan | 30°52'4"N,106°47"E     | Southwest China         | wheat |       |      | Intercropping       | 970   | 16.8 | Inceptisols | 2736.7  |
| 154 | Sichuan | 30°52'4"N,106°47"E     | Southwest China         | wheat |       |      | Intercropping       | 970   | 16.8 | Inceptisols | 2450    |
| 155 | Sichuan | 30°52'4"N,106°47"E     | Southwest China         | wheat |       |      | Intercropping       | 970   | 16.8 | Inceptisols | 2261.7  |
| 156 | Sichuan | 30°52'4"N,106°47"E     | Southwest China         | wheat |       |      | Intercropping       | 970   | 16.8 | Inceptisols | 2301.7  |
| 157 | Shaanxi | 34°43'38"N,108°11'34"E | Northwest China         | wheat | 12.00 | 0.82 | crop rotation       | 445   | 10.5 | Inceptisols | 1886    |
| 158 | Shaanxi | 34°43'38"N,108°11'34"E | Northwest China         | wheat | 12.00 | 0.82 | crop rotation       | 445   | 10.5 | Inceptisols | 1520    |
| 159 | Shaanxi | 35°12'00"N,107°40'30"E | Northwest China         | wheat | 11.80 | 0.77 | crop rotation       | 562   | 9.1  | Inceptisols | 1242    |
| 160 | Shaanxi | 35°12'00"N,107°40'30"E | Northwest China         | wheat | 11.80 | 0.77 | crop rotation       | 562   | 9.1  | Inceptisols | 1294    |
| 161 | Guangxi | 21°95'N,108°62'E       | Central and South China | rice  | 12.00 |      | Return to the field | 1600  | 22   | Inceptisols | 4426.5  |
| 162 | Guangxi | 21°95'N,108°62'E       | Central and South China | rice  | 12.00 |      | Return to the field | 1600  | 22   | Inceptisols | 4950    |
| 163 | Shanxi  | 34°35'N,110°15'E       | North China             | wheat | 12.00 |      | crop rotation       | 539.5 | 13.5 | Alfisols    | 3933    |
| 164 | Shanxi  | 34°35'N,110°15'E       | North China             | wheat | 12.00 |      | crop rotation       | 539.5 | 13.5 | Alfisols    | 4900    |
| 165 | Shanxi  | 34°35'N,110°15'E       | North China             | wheat | 12.00 |      | crop rotation       | 539.5 | 13.5 | Alfisols    | 4833    |
| 166 | Gansu   | 37°93'N,102°63'E       | Northwest China         | wheat | 11.80 | 0.68 | crop rotation       | 200   | 7.2  | Inceptisols | 6438.75 |
| 167 | Gansu   | 37°93'N,102°63'E       | Northwest China         | wheat | 11.80 | 0.68 | crop rotation       | 200   | 7.2  | Inceptisols | 7264.96 |
| 168 | Gansu   | 37°93'N,102°63'E       | Northwest China         | wheat | 11.80 | 0.68 | crop rotation       | 200   | 7.2  | Inceptisols | 6951.57 |
| 169 | Gansu   | 37°93'N,102°63'E       | Northwest China         | wheat | 11.80 | 0.68 | crop rotation       | 200   | 7.2  | Inceptisols | 8433.05 |
| 170 | Gansu   | 37°93'N,102°63'E       | Northwest China         | wheat | 11.80 | 0.68 | crop rotation       | 200   | 7.2  | Inceptisols | 8233.62 |
| 171 | Gansu   | 37°93'N,102°63'E       | Northwest China         | wheat | 11.80 | 0.68 | crop rotation       | 200   | 7.2  | Inceptisols | 7806.27 |
| 172 | Gansu   | 37°93'N,102°63'E       | Northwest China         | wheat | 11.80 | 0.68 | crop rotation       | 200   | 7.2  | Inceptisols | 6068.38 |

|     |         |                        |                         |       |       |      |               |        |      |             |         |        |
|-----|---------|------------------------|-------------------------|-------|-------|------|---------------|--------|------|-------------|---------|--------|
| 173 | Gansu   | 37°93'N,102°63'E       | Northwest China         | wheat | 11.80 | 0.68 | crop rotation | 200    | 7.2  | Inceptisols | 6581.2  |        |
| 174 | Gansu   | 37°93'N,102°63'E       | Northwest China         | wheat | 11.80 | 0.68 | crop rotation | 200    | 7.2  | Inceptisols | 6866.1  |        |
| 175 | Gansu   | 37°93'N,102°63'E       | Northwest China         | wheat | 11.80 | 0.68 | crop rotation | 200    | 7.2  | Inceptisols | 8005.7  |        |
| 176 | Gansu   | 37°93'N,102°63'E       | Northwest China         | wheat | 11.80 | 0.68 | crop rotation | 200    | 7.2  | Inceptisols | 5555.56 |        |
| 177 | Gansu   | 37°93'N,102°63'E       | Northwest China         | wheat | 11.80 | 0.68 | crop rotation | 200    | 7.2  | Inceptisols | 7435.9  |        |
| 178 | Gansu   | 37°93'N,102°63'E       | Northwest China         | wheat | 14.31 | 0.68 | crop rotation | 200    | 7.2  | Inceptisols | 6427    |        |
| 179 | Gansu   | 37°93'N,102°63'E       | Northwest China         | wheat | 14.31 | 0.68 | crop rotation | 200    | 7.2  | Inceptisols | 6941    |        |
| 180 | Gansu   | 37°93'N,102°63'E       | Northwest China         | wheat | 14.31 | 0.68 | crop rotation | 200    | 7.2  | Inceptisols | 8215    |        |
| 181 | Gansu   | 37°93'N,102°63'E       | Northwest China         | wheat | 14.31 | 0.68 | crop rotation | 200    | 7.2  | Inceptisols | 7252    |        |
| 182 | Gansu   | 37°93'N,102°63'E       | Northwest China         | wheat | 14.31 | 0.68 | crop rotation | 200    | 7.2  | Inceptisols | 8406    |        |
| 183 | Gansu   | 37°93'N,102°63'E       | Northwest China         | wheat | 14.31 | 0.68 | crop rotation | 200    | 7.2  | Inceptisols | 7771    |        |
| 184 | Gansu   | 38°04'N,102°35'E       | Northwest China         | wheat | 20.40 | 1.36 | interplanting | 200    | 7.2  | Inceptisols | 5565    |        |
| 185 | Gansu   | 38°04'N,102°35'E       | Northwest China         | wheat | 20.40 | 1.36 | interplanting | 200    | 7.2  | Inceptisols | 6450    |        |
| 186 | Gansu   | 38°04'N,102°35'E       | Northwest China         | wheat | 20.40 |      | interplanting | 200    | 7.2  | Inceptisols | 6450    |        |
| 187 | Guizhou | 27°02'23"N,107°14'24"E | Southwest China         | wheat | 20.40 |      | crop rotation | 1205   | 14   | Inceptisols | 2125    |        |
| 188 | Hunan   | 28°01'N,109°30'E       | Central and South China | maize | 12.00 | 1.32 | crop rotation | 1193.6 | 15.9 | Inceptisols | 5611.94 |        |
| 189 | Hunan   | 28°01'N,109°30'E       | Central and South China | maize | 12.00 | 1.32 | crop rotation | 1193.6 | 15.9 | Inceptisols | 3044.78 |        |
| 190 | Hunan   | 28°01'N,109°30'E       | Central and South China | maize | 12.00 | 1.32 | crop rotation | 1193.6 | 15.9 | Inceptisols | 5611.94 |        |
| 191 | Hunan   | 28°01'N,109°30'E       | Central and South China | maize | 12.00 | 1.32 | crop rotation | 1193.6 | 15.9 | Inceptisols | 6507.46 |        |
| 192 | Shaanxi | 34°21'N,108°10'E       | Northwest China         | wheat | 12.00 | 0.74 | crop rotation | 649.8  | 13   | Alfisols    | 5140    | 2634.8 |
| 193 | Shaanxi | 34°21'N,108°10'E       | Northwest China         | wheat | 12.00 | 0.74 | crop rotation | 649.8  | 13   | Alfisols    | 4235    | 3036.8 |
| 194 | Shaanxi | 34°21'N,108°10'E       | Northwest China         | wheat | 12.00 | 0.74 | crop rotation | 649.8  | 13   | Alfisols    | 51      | 2592   |
| 195 | Shaanxi | 34°21'N,108°10'E       | Northwest China         | wheat | 12.00 | 0.74 | crop rotation | 649.8  | 13   | Alfisols    | 2127    | 2856   |
| 196 | Guizhou | 27°82'N,106°42'E       | Southwest China         | maize | 12.00 |      | crop rotation | 1038.9 | 13   | Alfisols    |         | 9334   |
| 197 | Shaanxi | 35°20'N,107°78'E       | Northwest China         | wheat | 12.00 | 0.79 | crop rotation | 480.5  | 9.1  | Inceptisols |         | 4396   |

|     |         |                  |                 |       |       |      |               |       |     |             |      |
|-----|---------|------------------|-----------------|-------|-------|------|---------------|-------|-----|-------------|------|
| 198 | Shaanxi | 35°20'N,107°78'E | Northwest China | wheat | 12.00 | 0.79 | crop rotation | 480.5 | 9.1 | Inceptisols | 5405 |
| 199 | Shaanxi | 35°20'N,107°78'E | Northwest China | wheat | 12.00 | 0.79 | crop rotation | 480.5 | 9.1 | Inceptisols | 5250 |
| 200 | Shaanxi | 35°20'N,107°78'E | Northwest China | wheat | 12.00 | 0.79 | crop rotation | 474.5 | 9.1 | Inceptisols | 3812 |
| 201 | Shaanxi | 35°20'N,107°78'E | Northwest China | wheat | 12.00 | 0.79 | crop rotation | 474.5 | 9.1 | Inceptisols | 4162 |
| 202 | Shaanxi | 35°20'N,107°78'E | Northwest China | wheat | 12.00 | 0.79 | crop rotation | 474.5 | 9.1 | Inceptisols | 3726 |
| 203 | Shaanxi | 35°20'N,107°78'E | Northwest China | wheat | 12.00 | 0.79 | crop rotation | 664.5 | 9.1 | Inceptisols | 4759 |
| 204 | Shaanxi | 35°20'N,107°78'E | Northwest China | wheat | 12.00 | 0.79 | crop rotation | 664.5 | 9.1 | Inceptisols | 4812 |
| 205 | Shaanxi | 35°20'N,107°78'E | Northwest China | wheat | 12.00 | 0.79 | crop rotation | 664.5 | 9.1 | Inceptisols | 4350 |
| 206 | Shaanxi | 35°20'N,107°78'E | Northwest China | wheat | 12.00 | 0.80 | crop rotation | 480.5 | 9.1 | Inceptisols | 3610 |
| 207 | Shaanxi | 35°20'N,107°78'E | Northwest China | wheat | 12.00 | 0.80 | crop rotation | 480.5 | 9.1 | Inceptisols | 3451 |
| 208 | Shaanxi | 35°20'N,107°78'E | Northwest China | wheat | 12.00 | 0.80 | crop rotation | 480.5 | 9.1 | Inceptisols | 3434 |
| 209 | Shaanxi | 35°20'N,107°78'E | Northwest China | wheat | 12.00 | 0.80 | crop rotation | 474.5 | 9.1 | Inceptisols | 3760 |
| 210 | Shaanxi | 35°20'N,107°78'E | Northwest China | wheat | 12.00 | 0.80 | crop rotation | 474.5 | 9.1 | Inceptisols | 3902 |
| 211 | Shaanxi | 35°20'N,107°78'E | Northwest China | wheat | 12.00 | 0.80 | crop rotation | 474.5 | 9.1 | Inceptisols | 4009 |
| 212 | Shaanxi | 35°20'N,107°78'E | Northwest China | wheat | 12.00 | 0.80 | crop rotation | 664.5 | 9.1 | Inceptisols | 3832 |
| 213 | Shaanxi | 35°20'N,107°78'E | Northwest China | wheat | 12.00 | 0.80 | crop rotation | 664.5 | 9.1 | Inceptisols | 4427 |
| 214 | Shaanxi | 35°20'N,107°78'E | Northwest China | wheat | 12.00 | 0.80 | crop rotation | 664.5 | 9.1 | Inceptisols | 3790 |
| 215 | Shaanxi | 35°20'N,107°78'E | Northwest China | wheat | 12.00 | 0.80 | crop rotation | 722.2 | 9.1 | Inceptisols | 5353 |
| 216 | Shaanxi | 35°20'N,107°78'E | Northwest China | wheat | 12.00 | 0.80 | crop rotation | 722.2 | 9.1 | Inceptisols | 6249 |
| 217 | Shaanxi | 35°20'N,107°78'E | Northwest China | wheat | 12.00 | 0.80 | crop rotation | 722.2 | 9.1 | Inceptisols | 5814 |
| 218 | Shaanxi | 35°20'N,107°78'E | Northwest China | wheat | 12.00 | 0.80 | crop rotation | 476.8 | 9.1 | Inceptisols | 2233 |
| 219 | Shaanxi | 35°20'N,107°78'E | Northwest China | wheat | 12.00 | 0.80 | crop rotation | 476.8 | 9.1 | Inceptisols | 1992 |
| 220 | Shaanxi | 35°20'N,107°78'E | Northwest China | wheat | 12.00 | 0.80 | crop rotation | 476.8 | 9.1 | Inceptisols | 2595 |
| 221 | Shaanxi | 35°20'N,107°78'E | Northwest China | wheat | 12.00 | 0.80 | crop rotation | 677.9 | 9.1 | Inceptisols | 5470 |
| 222 | Shaanxi | 35°20'N,107°78'E | Northwest China | wheat | 12.00 | 0.80 | crop rotation | 677.9 | 9.1 | Inceptisols | 7560 |

|     |         |                  |                 |       |       |      |               |       |     |             |        |         |
|-----|---------|------------------|-----------------|-------|-------|------|---------------|-------|-----|-------------|--------|---------|
| 223 | Shaanxi | 35°20'N,107°78'E | Northwest China | wheat | 12.00 | 0.80 | crop rotation | 677.9 | 9.1 | Inceptisols | 7338   |         |
| 224 | Shaanxi | 35°20'N,107°78'E | Northwest China | wheat | 12.00 | 0.80 | crop rotation | 630.2 | 9.1 | Inceptisols | 1666   |         |
| 225 | Shaanxi | 35°20'N,107°78'E | Northwest China | wheat | 12.00 | 0.80 | crop rotation | 630.2 | 9.1 | Inceptisols | 1488   |         |
| 226 | Shaanxi | 35°20'N,107°78'E | Northwest China | wheat | 12.00 | 0.80 | crop rotation | 630.2 | 9.1 | Inceptisols | 2369   |         |
| 227 | Shaanxi | 35°20'N,107°78'E | Northwest China | wheat | 12.00 | 0.80 | crop rotation | 277.1 | 9.1 | Inceptisols | 4743   |         |
| 228 | Shaanxi | 35°20'N,107°78'E | Northwest China | wheat | 12.00 | 0.80 | crop rotation | 277.1 | 9.1 | Inceptisols | 2751   |         |
| 229 | Shaanxi | 35°20'N,107°78'E | Northwest China | wheat | 12.00 | 0.80 | crop rotation | 277.1 | 9.1 | Inceptisols | 2939   |         |
| 230 | Shaanxi | 35°20'N,107°78'E | Northwest China | wheat | 12.00 | 0.80 | crop rotation | 550.2 | 9.1 | Inceptisols | 1569.4 | 2277    |
| 231 | Shaanxi | 35°20'N,107°78'E | Northwest China | wheat | 12.00 | 0.80 | crop rotation | 550.2 | 9.1 | Inceptisols | 1397.5 | 2318    |
| 232 | Shaanxi | 35°20'N,107°78'E | Northwest China | wheat | 12.00 | 0.80 | crop rotation | 550.2 | 9.1 | Inceptisols | 1082.9 | 2119    |
| 233 | Shaanxi | 35°20'N,107°78'E | Northwest China | wheat | 12.00 | 0.80 | crop rotation | 532.7 | 9.1 | Inceptisols | 3401.4 | 5262    |
| 234 | Shaanxi | 35°20'N,107°78'E | Northwest China | wheat | 12.00 | 0.80 | crop rotation | 532.7 | 9.1 | Inceptisols | 3763.7 | 5112    |
| 235 | Shaanxi | 35°20'N,107°78'E | Northwest China | wheat | 12.00 | 0.80 | crop rotation | 532.7 | 9.1 | Inceptisols | 3644.3 | 5039    |
| 236 | Shaanxi | 35°12'N,107°45'E | Northwest China | wheat | 12.00 | 0.79 | crop rotation | 488   | 9.1 | Inceptisols | 2817   | 5272.73 |
| 237 | Shaanxi | 35°12'N,107°45'E | Northwest China | wheat | 12.00 | 0.79 | crop rotation | 488   | 9.1 | Inceptisols | 2817   | 5709.09 |
| 238 | Shaanxi | 35°12'N,107°45'E | Northwest China | wheat | 12.00 | 0.79 | crop rotation | 488   | 9.1 | Inceptisols | 2817   | 5309.09 |
| 239 | Shaanxi | 35°12'N,107°45'E | Northwest China | wheat | 12.00 | 0.79 | crop rotation | 488   | 9.1 | Inceptisols | 2817   | 5345.45 |
| 240 | Shaanxi | 35°12'N,107°45'E | Northwest China | wheat | 12.00 | 0.79 | crop rotation | 475   | 9.1 | Inceptisols | 2115   | 4072.73 |
| 241 | Shaanxi | 35°12'N,107°45'E | Northwest China | wheat | 12.00 | 0.79 | crop rotation | 475   | 9.1 | Inceptisols | 2115   | 4872.73 |
| 242 | Shaanxi | 35°12'N,107°45'E | Northwest China | wheat | 12.00 | 0.79 | crop rotation | 475   | 9.1 | Inceptisols | 2115   | 3672.73 |
| 243 | Shaanxi | 35°12'N,107°45'E | Northwest China | wheat | 12.00 | 0.79 | crop rotation | 475   | 9.1 | Inceptisols | 2115   | 4036.36 |
| 244 | Shaanxi | 35°12'N,107°45'E | Northwest China | wheat | 12.00 | 0.79 | crop rotation | 665   | 9.1 | Inceptisols | 2464   | 4472.73 |
| 245 | Shaanxi | 35°12'N,107°45'E | Northwest China | wheat | 12.00 | 0.79 | crop rotation | 665   | 9.1 | Inceptisols | 2464   | 5090.91 |
| 246 | Shaanxi | 35°12'N,107°45'E | Northwest China | wheat | 12.00 | 0.79 | crop rotation | 665   | 9.1 | Inceptisols | 2464   | 4800    |
| 247 | Shaanxi | 35°12'N,107°45'E | Northwest China | wheat | 12.00 | 0.79 | crop rotation | 665   | 9.1 | Inceptisols | 2115   | 4872.73 |

|     |          |                        |                         |       |       |      |                     |        |      |             |            |
|-----|----------|------------------------|-------------------------|-------|-------|------|---------------------|--------|------|-------------|------------|
| 248 | Hunan    | 28°28'N,113°21'E       | Central and South China | rice  | 10.40 | 1.05 | crop rotation       | 1422   | 17.2 | Inceptisols | 14690      |
| 249 | Jiangxi  | 28°07'N,115°56'E       | East China              | rice  | 12.00 | 3.06 | Return to the field | 1552.1 | 17.7 | Ultisols    | 11000      |
| 250 | Jiangxi  | 28°07'N,115°56'E       | East China              | rice  | 12.00 | 3.06 | Return to the field | 1552.1 | 17.7 | Ultisols    | 10400      |
| 251 | Jiangxi  | 28°07'N,115°56'E       | East China              | rice  | 12.00 | 3.06 | Return to the field | 1552.1 | 17.7 | Ultisols    | 10100      |
| 252 | Jiangxi  | 28°07'N,115°56'E       | East China              | rice  | 12.00 | 3.06 | Return to the field | 1552.1 | 17.7 | Ultisols    | 9860       |
| 253 | Zhejiang | 30°3'N,120°2'E         | East China              | rice  | 12.00 |      | crop rotation       | 1400   | 15   | Inceptisols | 7500 6835  |
| 254 | Zhejiang | 30°3'N,120°2'E         | East China              | rice  | 12.00 |      | crop rotation       | 1400   | 15   | Inceptisols | 7500 8323  |
| 255 | Zhejiang | 30°3'N,120°2'E         | East China              | rice  | 12.00 |      | crop rotation       | 1400   | 15   | Inceptisols | 7500 8239  |
| 256 | Jiangsu  | 31°17'49"N,119°54'02"E | East China              | wheat | 12.00 |      | crop rotation       | 570    | 16.1 | Inceptisols | 8506       |
| 257 | Jiangsu  | 31°17'49"N,119°54'02"E | East China              | wheat | 12.00 |      | crop rotation       | 570    | 16.1 | Inceptisols | 8962       |
| 258 | Jiangsu  | 31°17'49"N,119°54'02"E | East China              | wheat | 12.00 |      | crop rotation       | 570    | 16.1 | Inceptisols | 8456       |
| 259 | Jiangsu  | 31°17'49"N,119°54'02"E | East China              | wheat | 12.00 |      | crop rotation       | 570    | 16.1 | Inceptisols | 8658       |
| 260 | Jiangsu  | 31°17'49"N,119°54'02"E | East China              | wheat | 12.00 |      | crop rotation       | 960    | 16.1 | Inceptisols | 9289       |
| 261 | Jiangsu  | 31°17'49"N,119°54'02"E | East China              | wheat | 12.00 |      | crop rotation       | 960    | 16.1 | Inceptisols | 9086       |
| 262 | Jiangsu  | 31°17'49"N,119°54'02"E | East China              | wheat | 12.00 |      | crop rotation       | 960    | 16.1 | Inceptisols | 9391       |
| 263 | Jiangsu  | 31°17'49"N,119°54'02"E | East China              | wheat | 12.00 |      | crop rotation       | 960    | 16.1 | Inceptisols | 8528       |
| 264 | Hunan    | 26°45'42"N,111°52'32"E | Central and South China | rice  | 12.00 | 1.48 | crop rotation       | 1250   | 18.3 | Ultisols    | 11658.2    |
| 265 | Shanghai | 31°13'N,121°47'E       | East China              | rice  | 12.00 | 1.03 | crop rotation       | 1022   | 15.3 | Inceptisols | 3000 10000 |
| 266 | Shanghai | 31°13'N,121°47'E       | East China              | rice  | 12.00 | 1.03 | crop rotation       | 1022   | 15.3 | Inceptisols | 11452      |
| 267 | Shanghai | 31°13'N,121°47'E       | East China              | rice  | 12.00 | 1.03 | crop rotation       | 1022   | 15.3 | Inceptisols | 3000 9194  |
| 268 | Shanghai | 31°13'N,121°47'E       | East China              | rice  | 12.00 | 1.03 | crop rotation       | 1022   | 15.3 | Inceptisols | 10968      |
| 269 | Shanghai | 31°13'N,121°47'E       | East China              | rice  | 12.00 | 1.03 | crop rotation       | 1022   | 15.3 | Inceptisols | 3000 9516  |
| 270 | Shanghai | 31°13'N,121°47'E       | East China              | rice  | 12.00 | 1.03 | crop rotation       | 1022   | 15.3 | Inceptisols | 10484      |
| 271 | Shanghai | 31°13'N,121°47'E       | East China              | rice  | 12.00 | 1.03 | crop rotation       | 1022   | 15.3 | Inceptisols | 3000 8871  |
| 272 | Shanghai | 31°13'N,121°47'E       | East China              | rice  | 12.00 | 1.03 | crop rotation       | 1022   | 15.3 | Inceptisols | 10161      |

|     |         |                        |                         |       |       |      |               |        |      |             |         |
|-----|---------|------------------------|-------------------------|-------|-------|------|---------------|--------|------|-------------|---------|
| 273 | Hunan   | 29°13'03"N,112°28'53"E | Central and South China | rice  | 12.00 | 3.28 | crop rotation | 1237.7 | 16.6 | Inceptisols | 14240   |
| 274 | Hunan   | 29°13'03"N,112°28'53"E | Central and South China | rice  | 12.00 | 3.28 | crop rotation | 1237.7 | 16.6 | Inceptisols | 13600   |
| 275 | Hunan   | 29°13'03"N,112°28'53"E | Central and South China | rice  | 12.00 | 3.28 | crop rotation | 1237.7 | 16.6 | Inceptisols | 13010   |
| 276 | Hunan   | 29°13'03"N,112°28'53"E | Central and South China | rice  | 12.00 | 3.28 | crop rotation | 1237.7 | 16.6 | Inceptisols | 12470   |
| 277 | Hunan   | 29°13'03"N,112°28'53"E | Central and South China | rice  | 12.00 | 3.28 | crop rotation | 1237.7 | 16.6 | Inceptisols | 9490    |
| 278 | Hunan   | 29°13'N,112°28'E       | Central and South China | rice  | 12.00 | 3.28 | crop rotation | 1293   | 17.6 | Inceptisols | 9500    |
| 279 | Hunan   | 29°13'N,112°28'E       | Central and South China | rice  | 12.00 | 3.28 | crop rotation | 1293   | 17.6 | Inceptisols | 13000   |
| 280 | Shaanxi | 35°12'N,107°44'E       | Northwest China         | wheat | 12.00 | 0.79 | crop rotation | 664.5  | 9.1  | Inceptisols | 4427    |
| 281 | Shaanxi | 35°12'N,107°44'E       | Northwest China         | wheat | 12.00 | 0.79 | crop rotation | 664.5  | 9.1  | Inceptisols | 3790    |
| 282 | Shaanxi | 35°12'N,107°44'E       | Northwest China         | wheat | 12.00 | 0.79 | crop rotation | 664.5  | 9.1  | Inceptisols | 3832    |
| 283 | Shaanxi | 35°12'N,107°44'E       | Northwest China         | wheat | 12.00 | 0.79 | crop rotation | 476    | 9.1  | Inceptisols | 2826    |
| 284 | Shaanxi | 35°12'N,107°44'E       | Northwest China         | wheat | 12.00 | 0.79 | crop rotation | 476    | 9.1  | Inceptisols | 2912    |
| 285 | Shaanxi | 35°12'N,107°44'E       | Northwest China         | wheat | 12.00 | 0.79 | crop rotation | 476    | 9.1  | Inceptisols | 2676    |
| 286 | Shaanxi | 35°12'N,107°44'E       | Northwest China         | wheat | 12.00 | 0.79 | crop rotation | 700    | 9.1  | Inceptisols | 6478    |
| 287 | Shaanxi | 35°12'N,107°44'E       | Northwest China         | wheat | 12.00 | 0.79 | crop rotation | 700    | 9.1  | Inceptisols | 6576    |
| 288 | Shaanxi | 35°12'N,107°44'E       | Northwest China         | wheat | 12.00 | 0.79 | crop rotation | 700    | 9.1  | Inceptisols | 5370    |
| 289 | Shanxi  | 35°09'N,110°59'E       | North China             | wheat |       | 0.91 | crop rotation | 386.8  | 13.4 | Inceptisols | 5110    |
| 290 | Shanxi  | 35°09'N,110°59'E       | North China             | wheat |       | 0.91 | crop rotation | 386.8  | 13.4 | Inceptisols | 4810    |
| 291 | Shaanxi | 35°18'N,110°4'E        | Northwest China         | wheat | 12.00 |      | crop rotation | 319    | 10.5 | Inceptisols | 3470    |
| 292 | Shaanxi | 35°18'N,110°4'E        | Northwest China         | wheat | 12.00 |      | crop rotation | 319    | 10.5 | Inceptisols | 3170    |
| 293 | Shaanxi | 35°18'N,110°4'E        | Northwest China         | wheat |       |      | crop rotation | 244    | 10.5 | Inceptisols | 2390    |
| 294 | Shaanxi | 35°18'N,110°4'E        | Northwest China         | wheat |       |      | crop rotation | 244    | 10.5 | Inceptisols | 3560    |
| 295 | Shaanxi | 35°18'N,110°4'E        | Northwest China         | wheat |       |      | crop rotation | 515    | 10.5 | Inceptisols | 5740    |
| 296 | Shaanxi | 35°18'N,110°4'E        | Northwest China         | wheat |       |      | crop rotation | 515    | 10.5 | Inceptisols | 5330    |
| 297 | Shaanxi | 34°74'N,109°10'E       | Northwest China         | wheat | 12.00 | 0.58 | crop rotation | 525    | 12.5 | Alfisols    | 3949.15 |

|     |         |                  |                 |       |       |      |               |       |      |          |             |
|-----|---------|------------------|-----------------|-------|-------|------|---------------|-------|------|----------|-------------|
| 298 | Shaanxi | 34°74'N,109°10'E | Northwest China | wheat | 12.00 | 0.58 | crop rotation | 525   | 12.5 | Alfisols | 3864.41     |
| 299 | Shaanxi | 34°74'N,109°10'E | Northwest China | wheat | 12.00 | 0.58 | crop rotation | 525   | 12.5 | Alfisols | 4881.36     |
| 300 | Shaanxi | 34°74'N,109°10'E | Northwest China | wheat | 12.00 | 0.58 | crop rotation | 525   | 12.5 | Alfisols | 5372.88     |
| 301 | Gansu   | 35°17'N,107°30'E | Northwest China | wheat | 12.00 |      | crop rotation | 540   | 8    | Alfisols | 2535.5 9734 |
| 302 | Shanxi  | 37°27'N,111°30'E | North China     | maize | 12.00 | 0.52 | interplanting | 472   | 9.4  | Alfisols | 13539.75    |
| 303 | Shanxi  | 37°27'N,111°30'E | North China     | maize | 12.00 | 0.52 | interplanting | 472   | 9.4  | Alfisols | 13883.85    |
| 304 | Shanxi  | 37°27'N,111°30'E | North China     | maize | 12.00 | 0.52 | interplanting | 472   | 9.4  | Alfisols | 13506.75    |
| 305 | Shanxi  | 37°27'N,111°30'E | North China     | maize | 12.00 | 0.52 | interplanting | 472   | 9.4  | Alfisols | 13462       |
| 306 | Shanxi  | 37°27'N,111°30'E | North China     | maize | 12.00 |      | Intercropping | 535   | 9.4  | Alfisols | 10477.5     |
| 307 | Shanxi  | 37°27'N,111°30'E | North China     | maize | 12.00 |      | Intercropping | 535   | 9.4  | Alfisols | 11475       |
| 308 | Shanxi  | 37°27'N,111°30'E | North China     | maize | 12.00 |      | Intercropping | 535   | 9.4  | Alfisols | 10944       |
| 309 | Shanxi  | 37°27'N,111°30'E | North China     | maize | 12.00 |      | Intercropping | 535   | 9.4  | Alfisols | 11373       |
| 310 | Tianjin | 39°21'N,117°10'E | North China     | maize | 18.80 | 1.47 | crop rotation | 586.1 | 11.6 | Alfisols | 3401 7860   |
| 311 | Tianjin | 39°21'N,117°10'E | North China     | maize | 18.80 | 1.47 | crop rotation | 586.1 | 11.6 | Alfisols | 7800        |
| 312 | Beijing | 39°26'N,115°25'E | North China     | maize | 12.00 | 1.26 | crop rotation | 650   | 11   | Alfisols | 3400        |
| 313 | Hebei   | 38°30'N,116°83'E | North China     | maize |       |      | Intercropping | 578.5 | 13   | Alfisols | 7977        |
| 314 | Hebei   | 38°30'N,116°83'E | North China     | maize | 12.00 |      | Intercropping | 578.5 | 13   | Alfisols | 8293.5      |
| 315 | Shaanxi | 34°29'N,107°56'E | Northwest China | wheat |       |      |               | 525   | 10.5 |          | 5322        |
